# Supplementary material for: Comparison of the peroxidase activities of iron oxide nanozyme with DNAzyme and horseradish peroxidase
Source: Royal Society of Chemistry journal article supplement (doi:10.1039/d3nr01098h), 2023-01-01
Supplement: d3nr01098h1.pdf [file d3nr01098h1.pdf]

## **Electronic supplementary information**

### **Comparison of the peroxidase activities of iron oxide nanozyme with DNAzyme and horseradish peroxidase**

Chang Lu<sup>1,2</sup>, Mohamad Zandieh<sup>2</sup>, Jinkai Zheng<sup>1\*</sup> and Juewen Liu<sup>2\*</sup>

1. Institute of Food Science and Technology, Chinese Academy of Agricultural Sciences, Beijing  
100193, P. R. China

Email: zhengjinkai@caas.cn

2. Department of Chemistry, Waterloo Institute for Nanotechnology, University of Waterloo,  
Waterloo, Ontario, Canada

Email: liujw@uwaterloo.ca

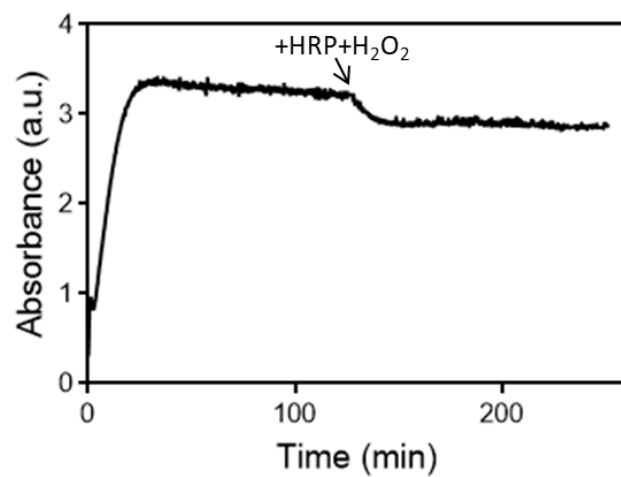

**Figure S1.** Stability of HRP after one catalysis of TMB and then adding more HRP and H<sub>2</sub>O<sub>2</sub> in pH 4 acetate buffer. The absorbance did not increase, suggesting that the substrate TMB was consumed.

## Calculations #1: Turnover Rates of G4, HRP and Fe<sub>3</sub>O<sub>4</sub> NPs (50 nm)

Length of path of light (100  $\mu$ L sample, 0.6 cm diameter of the well):

$$l = \frac{V}{A} = \frac{0.1}{\pi \times 0.3^2} = \frac{0.1 \text{ cm}^3}{0.283 \text{ cm}^2} = 0.35 \text{ cm}$$

Concentration of oxidized TMB:

$$(A) \text{ G4: } [ox\_TMB] = \frac{Abs_{652}}{\epsilon_{652} \times l} = \frac{1.39-0.26}{3.9 \times 10^4 \times 0.35} = 82.8 \mu M$$

$$(B) \text{ HRP: } [ox\_TMB] = \frac{Abs_{652}}{\epsilon_{652} \times l} = \frac{3.29-0.22}{3.9 \times 10^4 \times 0.35} = 225 \mu M$$

$$(C) \text{ Fe}_3\text{O}_4: [ox\_TMB] = \frac{Abs_{652}}{\epsilon_{652} \times l} = \frac{0.42-0.14}{3.9 \times 10^4 \times 0.35} = 20.5 \mu M$$

Catalytic turnovers during 20 min:

$$(A) \text{ G4: } n = \frac{\text{Conc. of ox-TMB}}{\text{Conc. of G4}} = \frac{82.8 \times 10^{-6} \text{ M}}{0.5 \times 10^{-6} \text{ M}} = 166 \text{ catalytic turnovers}$$

$$(B) \text{ HRP: } n = \frac{\text{Conc. of ox-TMB}}{\text{Conc. of HRP}} = \frac{225 \times 10^{-6} \text{ M}}{0.5 \times 10^{-9} \text{ M}} = 4.5 \times 10^5 \text{ catalytic turnovers}$$

$$(C) \text{ Fe}_3\text{O}_4: n = \frac{\text{Conc. of ox-TMB}}{\text{Conc. of Fe}_3\text{O}_4\text{NPs}} = \frac{20.5 \times 10^{-6} \text{ M}}{0.5 \times 10^{-9} \text{ M}} = 4.1 \times 10^4 \text{ catalytic turnovers}$$

$$n = \frac{\text{Conc. of ox-TMB}}{\text{Conc. of surface Fe atoms}} = \frac{20.5 \times 10^{-6} \text{ M}}{28 \times 10^{-6} \text{ M}} = 0.73 \text{ catalytic turnovers}$$

Turnover rate:

$$(A) \text{ G4: } T = \frac{166}{1200 \text{ s}} = 0.14 \text{ s}^{-1}$$

$$(B) \text{ HRP: } T = \frac{4.5 \times 10^5}{1200 \text{ s}} = 375 \text{ s}^{-1}$$

$$(C) \text{ Fe}_3\text{O}_4: T = \frac{4.1 \times 10^4}{1200 \text{ s}} = 34.2 \text{ s}^{-1} \quad (\text{each NP} = 1 \text{ active site})$$

$$T = \frac{0.73}{1200 \text{ s}} = 6.1 \times 10^{-4} \text{ s}^{-1} \quad (\text{each surface Fe} = 1 \text{ active site})$$

## Calculations #2: Rates Normalized to Mass Concentration of G4, HRP and Fe<sub>3</sub>O<sub>4</sub> NPs (50 nm)

$$(A) \text{ G4: } r = \frac{\text{slope of the kinetics curve}}{\text{mass concentration}} = \frac{9.2 \times 10^{-4} \text{ s}^{-1}}{3.18 \text{ mg.L}^{-1}} = 2.9 \times 10^{-4} \text{ L.mg}^{-1}.\text{s}^{-1}$$

$$(B) \text{ HRP: } r = \frac{\text{slope of the kinetics curve}}{\text{mass concentration}} = \frac{2.5 \times 10^{-3} \text{ s}^{-1}}{0.02 \text{ mg.L}^{-1}} = 0.125 \text{ L.mg}^{-1}.\text{s}^{-1}$$

$$(C) \text{ Fe}_3\text{O}_4: r = \frac{\text{slope of the kinetics curve}}{\text{mass concentration}} = \frac{2.2 \times 10^{-4} \text{ s}^{-1}}{110 \text{ mg.L}^{-1}} = 2 \times 10^{-6} \text{ L.mg}^{-1}.\text{s}^{-1}$$

## Calculations #3: Molar Concentration of Fe<sub>3</sub>O<sub>4</sub> NPs (50 nm) and the Surface Fe Atoms

$$\text{Surface area of each Fe}_3\text{O}_4 \text{ NP: } A_{NP} = 4\pi \times 25^2 = 7854 \text{ nm}^2$$

$$\text{Surface area of each hexagonal surface unit cell: } A_{unit \text{ cell}} = 2 \times \frac{\sqrt{3}}{4} \times (0.594)^2 = 0.305 \text{ nm}^2$$

$$\text{Number of surface unit cells per NP: } N_{unit \text{ cell}} = \frac{A_{NP}}{A_{unit \text{ cell}}} = \frac{7854}{0.305} = 25751$$

$$\text{Number of surface Fe atoms per NP: } N_{surface \text{ Fe}} = 25751 \times 2 = 51502 \text{ (*)}$$

$$\text{Mass of each NP: } mass = D \times V = 5.17 \text{ g/cm}^3 \times \frac{4}{3} \pi (25 \times 10^{-7})^3 = 3.38 \times 10^{-16} \text{ g}$$

$$\text{Number of NPs per 110 mg Fe}_3\text{O}_4 \text{ NP: } N_{NPs} = \frac{110 \times 10^{-3} \text{ g}}{3.38 \times 10^{-16} \text{ g}} = 3.25 \times 10^{14} \text{ nanoparticles (**)}$$

$$\text{Molar concentration of Fe}_3\text{O}_4 \text{ NP: } N_{NPs} = 3.25 \times 10^{14} \times \frac{1 \text{ mol}}{6.022 \times 10^{23}} = 0.5 \text{ nmol}$$

Using (\*) and (\*\*) 

$$\text{Number of total surface Fe atoms: } N_{total \text{ surface Fe}} = 51502 \times 3.25 \times 10^{14} = 1.67 \times 10^{19}$$

Concentration of total surface Fe atoms (catalytic active sites):

$$[E] = 1.67 \times 10^{19} \times \frac{1 \text{ mol}}{6.022 \times 10^{23}} = 28 \text{ } \mu\text{mol}$$
